# Supplementary material
Source: PubMed Central journal article supplement (PMC8693385)
Supplement: NIHMS1754213-supplement-1.pdf [file NIHMS1754213-supplement-1.pdf]

**Supplementary Table 1. Sociodemographics and marijuana/tobacco use among young adults in 6 US metropolitan statistical areas assessed in Sept-Dec 2018 (baseline), N=3,006**

| Variable                                                  | No legalized marijuana retail         |                                        |                                       |                                    |                                    | Legalized marijuana retail               |                                        | p     |
|-----------------------------------------------------------|---------------------------------------|----------------------------------------|---------------------------------------|------------------------------------|------------------------------------|------------------------------------------|----------------------------------------|-------|
|                                                           | Total<br>N=3006<br>n (%) or<br>M (SD) | Atlanta<br>N=593<br>N (%) or<br>M (SD) | Boston<br>N=575<br>N (%) or<br>M (SD) | MSP<br>N=543<br>N (%) or<br>M (SD) | OKC<br>N=319<br>N (%) or<br>M (SD) | San Diego<br>N=474<br>N (%) or<br>M (SD) | Seattle<br>N=502<br>N (%) or<br>M (SD) |       |
| <b><i>Sociodemographics</i></b>                           |                                       |                                        |                                       |                                    |                                    |                                          |                                        |       |
| Age, M (SD)                                               | 24.56 (4.72)                          | 24.86 (4.75)                           | 24.40 (4.56)                          | 23.78 (4.44)                       | 25.43 (4.87)                       | 24.84 (4.99)                             | 24.39 (4.65)                           | <.001 |
| Male, N (%)*                                              | 1271 (42.3)                           | 249 (42.0)                             | 240 (41.7)                            | 233 (42.9)                         | 125 (39.2)                         | 205 (43.2)                               | 219 (43.6)                             | <.001 |
| Sexual minority, N (%)                                    | 950 (31.6)                            | 135 (22.8)                             | 191 (33.2)                            | 218 (40.1)                         | 91 (28.5)                          | 115 (24.1)                               | 200 (39.8)                             | <.001 |
| Race, N (%)                                               |                                       |                                        |                                       |                                    |                                    |                                          |                                        | <.001 |
| White                                                     | 2151 (71.6)                           | 341 (57.5)                             | 425 (73.9)                            | 447 (82.3)                         | 255 (79.9)                         | 315 (66.5)                               | 368 (73.3)                             |       |
| Black                                                     | 159 (5.3)                             | 84 (14.2)                              | 21 (3.7)                              | 20 (3.7)                           | 8 (2.5)                            | 13 (2.7)                                 | 13 (2.6)                               |       |
| Asian                                                     | 367 (12.2)                            | 116 (19.6)                             | 82 (14.3)                             | 32 (5.9)                           | 16 (5.0)                           | 67 (14.1)                                | 54 (10.8)                              |       |
| Other                                                     | 329 (11.0)                            | 52 (8.7)                               | 47 (8.2)                              | 44 (8.1)                           | 40 (12.6)                          | 79 (16.7)                                | 67 (13.4)                              |       |
| Hispanic, N (%)                                           | 343 (11.4)                            | 61 (10.3)                              | 53 (9.2)                              | 34 (6.3)                           | 30 (9.4)                           | 118 (24.9)                               | 47 (9.4)                               | <.001 |
| <b><i>Marijuana use, N (%)</i></b>                        |                                       |                                        |                                       |                                    |                                    |                                          |                                        |       |
| Lifetime                                                  | 2126 (70.7)                           | 376 (63.4)                             | 398 (69.2)                            | 406 (74.8)                         | 203 (63.6)                         | 335 (70.7)                               | 408 (81.3)                             | <.001 |
| Past-month                                                | 1178 (39.2)                           | 175 (29.4)                             | 227 (39.5)                            | 214 (39.4)                         | 95 (29.8)                          | 190 (40.1)                               | 277 (55.2)                             | <.001 |
| <b><i>Marijuana use characteristics</i></b>               |                                       |                                        |                                       |                                    |                                    |                                          |                                        |       |
| Number of days used, past 30 days, M (SD)                 | 13.41 (11.54)                         | 12.19 (11.27)                          | 13.58 (11.12)                         | 12.75 (11.48)                      | 12.15 (11.48)                      | 12.08 (11.08)                            | 15.91 (12.09)                          | .002  |
| Times used per day, M (SD)                                | 2.64 (2.68)                           | 2.59 (2.83)                            | 2.42 (2.26)                           | 2.31 (2.36)                        | 2.98 (2.96)                        | 2.79 (3.01)                              | 2.88 (2.76)                            | .004  |
| Ways ever used, N (%)                                     |                                       |                                        |                                       |                                    |                                    |                                          |                                        |       |
| Smoke                                                     | 1128 (95.8)                           | 170 (97.1)                             | 214 (94.3)                            | 210 (98.1)                         | 93 (97.9)                          | 177 (93.2)                               | 264 (95.3)                             | .077  |
| Pipe/Bong                                                 | 1007 (85.5)                           | 150 (85.7)                             | 188 (82.8)                            | 191 (89.3)                         | 79 (83.2)                          | 165 (86.8)                               | 234 (85.5)                             | .518  |
| Ingest                                                    | 1001 (85.0)                           | 144 (82.3)                             | 182 (80.2)                            | 183 (85.5)                         | 73 (76.8)                          | 176 (92.6)                               | 243 (87.7)                             | <.001 |
| Vape                                                      | 905 (76.8)                            | 126 (72.0)                             | 174 (76.7)                            | 167 (78.0)                         | 65 (68.4)                          | 152 (80.0)                               | 221 (79.8)                             | .048  |
| Other                                                     | 70 (5.9)                              | 7 (4.0)                                | 12 (5.3)                              | 15 (7.0)                           | 6 (6.3)                            | 8 (4.2)                                  | 22 (7.9)                               | .615  |
| Way used most of the time, N (%)                          |                                       |                                        |                                       |                                    |                                    |                                          |                                        | <.001 |
| Smoke                                                     | 621 (52.7)                            | 102 (58.3)                             | 128 (56.4)                            | 140 (65.4)                         | 59 (62.1)                          | 61 (32.1)                                | 131 (47.3)                             |       |
| Pipe/Bong                                                 | 173 (14.7)                            | 28 (16.0)                              | 27 (11.9)                             | 23 (10.7)                          | 12 (12.6)                          | 32 (16.8)                                | 51 (18.4)                              |       |
| Ingest                                                    | 105 (8.9)                             | 13 (7.4)                               | 15 (6.6)                              | 16 (7.5)                           | 7 (7.4)                            | 27 (14.2)                                | 27 (9.7)                               |       |
| Vape                                                      | 250 (21.2)                            | 29 (16.6)                              | 54 (23.8)                             | 31 (14.5)                          | 14 (14.7)                          | 68 (35.8)                                | 54 (19.5)                              |       |
| Other                                                     | 19 (1.6)                              | 1 (0.6)                                | 1 (0.4)                               | 2 (0.9)                            | 1 (1.1)                            | 1 (0.5)                                  | 13 (4.7)                               |       |
| Prefer not to answer                                      | 10 (0.8)                              | 2 (1.1)                                | 2 (0.9)                               | 2 (0.9)                            | 2 (2.1)                            | 1 (0.5)                                  | 1 (0.4)                                |       |
| <b><i>Past-month use of any tobacco product N (%)</i></b> |                                       |                                        |                                       |                                    |                                    |                                          |                                        |       |
| Cigarettes                                                | 1534 (51.0)                           | 352 (59.4)                             | 327 (56.9)                            | 255 (47.0)                         | 151 (47.3)                         | 256 (54.0)                               | 193 (38.4)                             | <.001 |
| E-cigarettes                                              | 808 (26.9)                            | 122 (20.6)                             | 129 (22.4)                            | 159 (29.3)                         | 86 (27.0)                          | 117 (24.7)                               | 195 (38.8)                             | <.001 |
| Little cigars/cigarillos                                  | 1133 (37.7)                           | 176 (29.7)                             | 188 (32.7)                            | 217 (40.0)                         | 134 (42.0)                         | 171 (36.1)                               | 247 (49.2)                             | <.001 |
| Little cigars/cigarillos                                  | 378 (12.6)                            | 71 (12.0)                              | 51 (8.9)                              | 75 (13.8)                          | 44 (13.8)                          | 52 (11.0)                                | 85 (16.9)                              | .003  |

|                                    |             |             |             |             |             |             |             |       |
|------------------------------------|-------------|-------------|-------------|-------------|-------------|-------------|-------------|-------|
| Large cigars                       | 213 (7.1)   | 44 (7.4)    | 39 (6.8)    | 40 (7.4)    | 30 (9.4)    | 31 (6.5)    | 29 (5.8)    | .497  |
| Hookah                             | 278 (9.2)   | 76 (12.8)   | 37 (6.4)    | 52 (9.6)    | 27 (8.5)    | 40 (8.4)    | 46 (9.2)    | .010  |
| Smokeless tobacco                  | 105 (3.5)   | 20 (3.4)    | 18 (3.1)    | 13 (2.4)    | 10 (3.1)    | 27 (5.7)    | 17 (3.4)    | .103  |
| <b><i>Psychosocial factors</i></b> |             |             |             |             |             |             |             |       |
| Parental use of... N (%)           |             |             |             |             |             |             |             |       |
| Marijuana                          | 331 (28.1)  | 39 (22.3)   | 59 (26.0)   | 60 (28.0)   | 33 (34.7)   | 51 (26.8)   | 89 (32.1)   | .136  |
| Tobacco                            | 462 (39.2)  | 64 (36.6)   | 89 (39.2)   | 94 (43.9)   | 49 (51.6)   | 61 (32.1)   | 105 (37.9)  | .021  |
| Number of friends using... M (SD)  |             |             |             |             |             |             |             |       |
| Marijuana                          | 0.81 (0.39) | 0.73 (0.44) | 0.82 (0.38) | 0.86 (0.35) | 0.71 (0.46) | 0.79 (0.46) | 0.91 (0.29) | <.001 |
| Tobacco                            | 0.11 (0.12) | 0.10 (0.13) | 0.09 (0.11) | 0.11 (0.12) | 0.13 (0.14) | 0.10 (0.12) | 0.13 (0.13) | <.001 |
| Depressive symptoms, M (SD)        | 1.98 (1.75) | 1.92 (1.76) | 1.82 (1.68) | 1.82 (0.12) | 1.65 (0.17) | 1.77 (0.13) | 1.77 (0.11) | .937  |

Note: p-values indicate omnibus tests (per ANOVA and Chi-Square) across MSAs. \* 87 reported "other" sex.
